# Supplementary material
Source: PubMed Central journal article supplement (PMC2818690)

## Supplementary Figure Legends

**Supplementary Figure 1.** Lysates (50  $\mu$ g) from NSCLC cells, MCF-7 and MDA-MB-231 cells were analyzed for ER $\beta$  by Western blotting. For quantification, recombinant ER $\beta$  protein was loaded on the gel.

**Supplementary Figure 2.** NSCLC cells grown in phenol-red free media were treated with 17 $\beta$ -estradiol (100 nM) for 1h. Nuclear and cytosolic fractions were prepared and ER $\beta$  was analyzed by Western blotting with antibodies from Affinity BioReagents. PARP and  $\beta$ -actin were used as loading controls for nuclear and cytosolic fractions, respectively.

**Supplementary Figure 3.** NSCLC cells grown in phenol-red free media were treated with 17 $\beta$ -estradiol for 1h, and ER nuclear localization was measured by ArrayScan instrument as described in “Materials and Methods”. ER $\beta$  antibodies were from Affinity BioReagents. Values are shown as means ( $\pm$ SD) from three identical wells.

**Supplementary Figure 4.** NSCLC cells were treated with TNF $\alpha$  (30 ng/ml) for 15 min, and NF-kB nuclear localization was measured by ArrayScan instrument using anti-NF-kB antibodies. Values are shown as means ( $\pm$ SD) from three identical wells.

**Supplementary Figure 5.** NSCLC cells grown in phenol-red free media were treated with 17 $\beta$ -estradiol (100 nM), staurosporine (200 nM) or Trichostatin A (1  $\mu$ M). Nuclear and cytosolic fractions were prepared and ER $\beta$  was analyzed by Western blotting with antibodies from Upstate Biotechnology. PARP and  $\beta$ -actin were used as loading controls for nuclear and cytosolic fractions, respectively.

**Supplementary Figure 6.** RT-PCR analysis of MTA1 and MTA1s transcripts in NSCLC cells. The primers used for amplifying the MTA1 and MTA1s were as follows, forward, 5'-AAGACCACCGACAGATACGTGC-3'; reverse, 5'-TGGCCTCTCTCCATCTAACC G-3'.

### Supplementary Figure 1

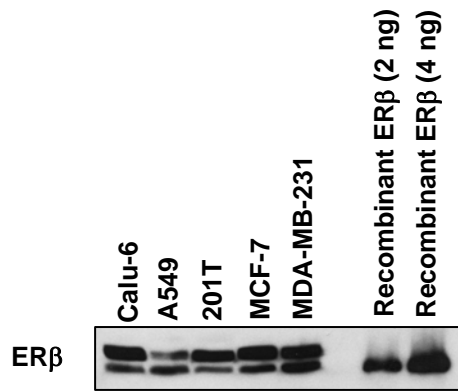

### Supplementary Figure 2

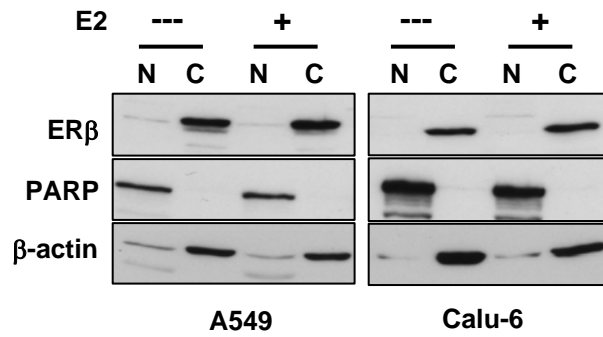

Supplementary Figure 3

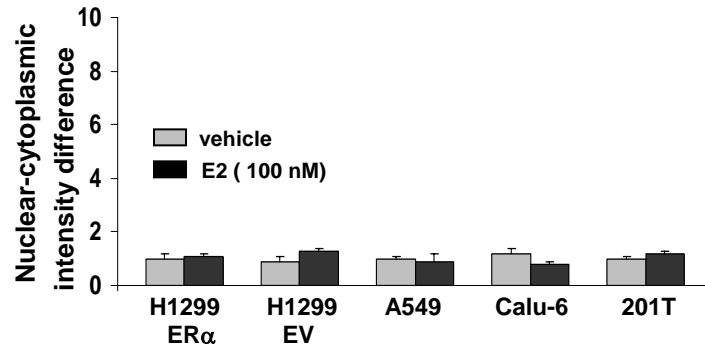

Supplementary Figure 4

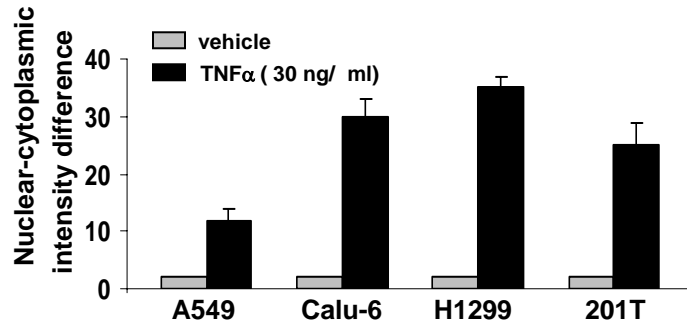

### Supplementary Figure 5

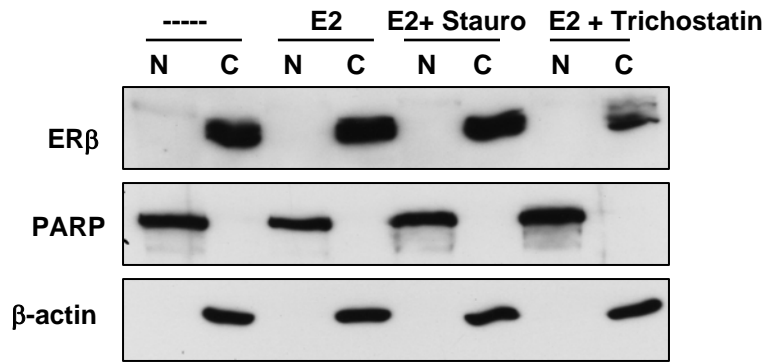

### Supplementary Figure 6

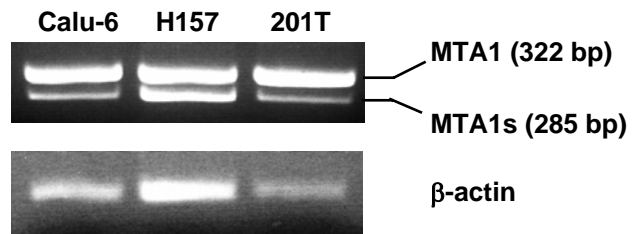

Supplement: me.2008-0431_1.pdf [file me.2008-0431_1.pdf]
